# Supplementary material
Source: publisher figshare collection journal article supplement (https://frontiersin.figshare.com/ndownloader/files/24315653)
Supplement: Supplementary file [file 24315653]

|                     |                                                               |     |
|---------------------|---------------------------------------------------------------|-----|
| Vd-LRNA Kauai short | TTGGATTGTGTGATCCAACCTGATGAGAACAAAAGTTCGAAACCTTCAACCTAGTGTGAGG | 60  |
| FHVd-LR Oahu        | TTGGATTGTGTGATCCAACCTGATGAGAACAAAAGTTCGAAACCTTCAACCTAGTGTGAGG | 60  |
|                     | *****                                                         |     |
| Vd-LRNA kAUAI short | ACTCTCACCTCTTCGGCTCTCTGCCTGGAACGCTATGCAGCTCTACCGCTCTATTCCTCG  | 120 |
| FHVd-LR Oahu        | ACTCTCACCTCTTCGGCTCTCTGCCTGGAACGCTATGCAGCTCTACCGCTCTATTCCTCG  | 120 |
|                     | *****                                                         |     |
| Vd-LRNA Kauai short | ACTAGTTCTTGGAAATATCGGGGAGTTCCATTCTTCTAGTAAAGTTTCGGTGACGGCCAG  | 180 |
| FHVd-LR Oahu        | ACTAGTTCTTGGAAATATCGGGGAGTTCCATACTTCTAGTAAAGTTTCGGTGACGGCCAG  | 180 |
|                     | *****                                                         |     |
| Vd-LRNA Kauai short | GGTAGTAGCACTTTTGTGTAAGTTTCGTCCTTTTGGACTCATCAGTAGGAAAACACATTC  | 240 |
| FHVd-LR Oahu        | GGTAGTAGCACTTTTGTGTAAGTTTCGTCCTTTTGGACTCATCAGTAGGAAAACACATTC  | 240 |
|                     | *****                                                         |     |
| Vd-LRNA Kauai short | CTAGACTTCGCGTGGGTGAGGGACAGCCGTCAGTGCGCCGTATATGCTATGAATATCTCA  | 300 |
| FHVd-LR Oahu        | CTAGACTTCGCGTGGGTGCGGGACAGCGGTCAGTGCGCCGTGCATGCTGTGTTTATCTCA  | 300 |
|                     | *****                                                         |     |
| Vd-LRNA Kauai short | ATCAATTCATAGGTATACTGGACGAGTGCGGAGTCCCAATACTCCCCTCTGAAGGTA     | 358 |
| FHVd-LR Oahu        | ATCAAAGCACAGATGTACTGGACGAGTGCCGAGTCCCAATACTCCCCTCTGAAGGTA     | 358 |
|                     | *****                                                         |     |

**Figure S3.** Pairwise comparison between the short viroid-like RNA (Vd-LRNA) from Kauai island and FHVd-LR (master sequence) from Oahu island. The sequence identity between the two sequences is 96.09%. Positions with identical nucleotides are denoted by asterisks.
